# Supplementary material for: A nationwide registry study on heart failure in Norway from 2008 to 2018: variations in lookback period affect incidence estimates
Source: PubMed Central journal article supplement (PMC8898410; doi:10.1186/s12872-022-02522-y), 2022-03-05

# Supplementary Data

## A nationwide registry study on heart failure in Norway from 2008-2018: variations in lookback period affects incidence estimates

Kristina Malene Ødegaard, Sandre Svaton Lirhus, Hans Olav Melberg, Jonas Hallén, and Sigrun Halvorsen

### Table of Contents

|                                                                                                                                                                                                    |   |
|----------------------------------------------------------------------------------------------------------------------------------------------------------------------------------------------------|---|
| <b>Table S1.</b> Definitions.....                                                                                                                                                                  | 2 |
| <b>Figure S1.</b> Cohort creation flow chart.....                                                                                                                                                  | 4 |
| <b>Table S2.</b> The number of incident heart failure cases detected by various length of lookback periods (1 to 10 years) and relative difference by calendar year (2009-2018), by age group..... | 5 |
| <b>Table S3.</b> Crude incidence and prevalence of HF in 2018, stratified by sex and age group.....                                                                                                | 6 |
| <b>Figure S2.</b> Yearly prevalence from 2014-2018 by 5-year age groups .....                                                                                                                      | 8 |

**Table S1. Definitions**

| <b>Condition</b>                                   | <b>NPR: ICD-10 code or procedure code (NOMESCO)</b>                                                                                                                                                                              | <b>NorPD: ATC code or reimbursement code (ICD-10 or ICPC-2)</b>                                                        |
|----------------------------------------------------|----------------------------------------------------------------------------------------------------------------------------------------------------------------------------------------------------------------------------------|------------------------------------------------------------------------------------------------------------------------|
| Heart Failure                                      | I11.0, I13.0, I13.2, I42.x, I50.x                                                                                                                                                                                                |                                                                                                                        |
| Atrial fibrillation                                | I48                                                                                                                                                                                                                              | Reimbursement codes: I48, K78 (ICPC)                                                                                   |
| Cerebrovascular disease (including stroke and TIA) | G45, G46, H34.0, I60-I69                                                                                                                                                                                                         |                                                                                                                        |
| Hypertension (at least 180 days prior to HF index) | I10, I11, I12, I13, I15                                                                                                                                                                                                          | Reimbursement codes: I10-I13, I15 (ICD10) or K86, K87 (ICPC)                                                           |
| Ischemic heart disease                             | I20, I21, I22, I23, I24, I25                                                                                                                                                                                                     | Reimbursement codes I20-I25 (ICD-10)                                                                                   |
| Myocardial infarction                              | I21, I22                                                                                                                                                                                                                         |                                                                                                                        |
| Peripheral artery disease                          | I70, I71, I72, I73, I74, I77, I78, I79, R02                                                                                                                                                                                      |                                                                                                                        |
| COPD                                               | J40-J44                                                                                                                                                                                                                          | Reimbursement codes J40-J44 (ICD-10) or R95 (ICPC-2)                                                                   |
| Anemia                                             | D50, D51, D52, D53, D55, D56, D57, D58, D59, D60, D61, D62, D63, D64                                                                                                                                                             | ICPC: Reimbursement codes B80, B81, B82 or ICD10: D50, D51, D52, D53, D55, D56, D57, D58, D59, D60, D61, D62, D63, D64 |
| Cancer                                             | C00, C01, C02, C03, C04, C05, C06, C07, C08, C09, C10, C11, C12, C13, C14, C15, C16, C17, C18, C19, C20, C21, C22, C23, C24, C25, C26, C30, C31, C32, C33, C34, C37, C38, C39, C40, C41, C43, C44, C45, C46, C47, C48, C49, C50, |                                                                                                                        |

|                        |                                                                                                                                                                                                                            |                                                                                                        |
|------------------------|----------------------------------------------------------------------------------------------------------------------------------------------------------------------------------------------------------------------------|--------------------------------------------------------------------------------------------------------|
|                        | C51, C52, C53, C54, C55, C56, C57, C58, C60, C61, C62, C63, C64, C65, C66, C67, C68, C69, C70, C71, C72, C73, C74, C75, C76, C77, C78, C79, C80, C81, C82, C83, C84, C85, C86, C88, C90, C91, C92, C93, C94, C95, C96, C97 |                                                                                                        |
| Chronic kidney disease | N17-N19                                                                                                                                                                                                                    |                                                                                                        |
| Dementia               | F00, F01, F02, F03, G30, G31.8                                                                                                                                                                                             | Reimbursement code P70 (ICPC)                                                                          |
| Depression             | F32, F33                                                                                                                                                                                                                   | Reimbursement codes P03 (ICPC), P76 (ICPC)<br>Or ATC-code N06A                                         |
| Diabetes Mellitus      | E10-E14                                                                                                                                                                                                                    | ATC codes: A10A or A10B<br>or reimbursement codes: E10, E11, E13, E14 (ICD-10)<br>or T89, T90 (ICPC-2) |
| Dyslipidemia           | E78                                                                                                                                                                                                                        | Reimbursement codes: E78 (ICD-10)<br>or T93 (ICPC)<br>ATC-codes: C10A or C10B                          |
| Thyroid disease        |                                                                                                                                                                                                                            | ATC-codes: H03, H01AB or<br>Reimbursement codes T85 (ICPC), T86 (ICPC)                                 |

**Figure S1. Cohort creation flow chart**

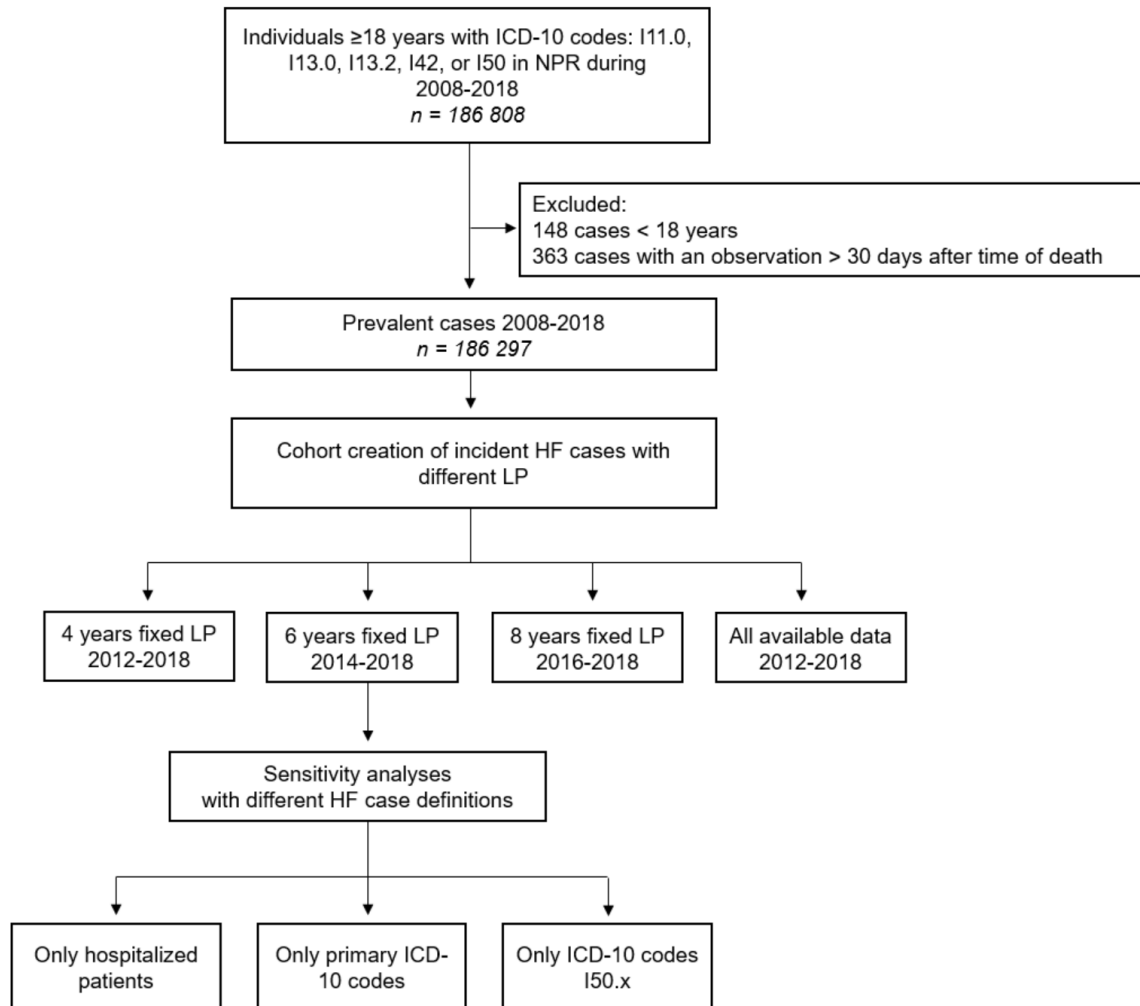

NPR, Norwegian Patient Registry; LP, Lookback Period; HF, Heart Failure

**Table S2.** The number of incident heart failure cases detected by various length of lookback periods (1 to 10 years) and relative difference by calendar year (2009-2018), by age group

| Calendar year                      |       |       |       |       |       |       |       |       |       |       | 2018 |       |        |
|------------------------------------|-------|-------|-------|-------|-------|-------|-------|-------|-------|-------|------|-------|--------|
|                                    | 2009  | 2010  | 2011  | 2012  | 2013  | 2014  | 2015  | 2016  | 2017  | 2018  | LP   | AD, n | RD, %  |
| <b>Age group</b><br><b>&gt; 75</b> | 14891 | 14767 | 13900 | 14270 | 14110 | 13691 | 13818 | 13708 | 13864 | 14149 | 1    | 5379  | 61.3 % |
|                                    |       | 12102 | 11412 | 11701 | 11562 | 11239 | 11162 | 11260 | 11461 | 11725 | 2    | 2955  | 33.7 % |
|                                    |       |       | 10157 | 10567 | 10374 | 10133 | 10060 | 10198 | 10364 | 10673 | 3    | 1903  | 21.7 % |
|                                    |       |       |       | 9858  | 9708  | 9518  | 9469  | 9502  | 9744  | 10077 | 4    | 1307  | 14.9 % |
|                                    |       |       |       |       | 9246  | 9084  | 9060  | 9097  | 9339  | 9643  | 5    | 873   | 10.0 % |
|                                    |       |       |       |       |       | 8811  | 8749  | 8806  | 9040  | 9365  | 6    | 595   | 6.8 %  |
|                                    |       |       |       |       |       |       | 8535  | 8582  | 8825  | 9154  | 7    | 384   | 4.4 %  |
|                                    |       |       |       |       |       |       |       | 8420  | 8681  | 8995  | 8    | 225   | 2.6 %  |
|                                    |       |       |       |       |       |       |       |       | 8572  | 8874  | 9    | 104   | 1.2 %  |
|                                    |       |       |       |       |       |       |       |       |       | 8770  | 10   |       |        |
| <b>&lt;75</b>                      | 7874  | 8203  | 8164  | 8460  | 8855  | 8808  | 9314  | 9510  | 9901  | 10215 | 1    | 4123  | 67.7 % |
|                                    |       | 6612  | 6482  | 6765  | 6890  | 6889  | 7247  | 7422  | 7756  | 7843  | 2    | 1751  | 28.7 % |
|                                    |       |       | 5916  | 6140  | 6266  | 6242  | 6582  | 6721  | 7043  | 7136  | 3    | 1044  | 17.1 % |
|                                    |       |       |       | 5821  | 5968  | 5935  | 6255  | 6360  | 6711  | 6791  | 4    | 699   | 11.5 % |
|                                    |       |       |       |       | 5785  | 5746  | 6042  | 6155  | 6493  | 6569  | 5    | 477   | 7.8 %  |
|                                    |       |       |       |       |       | 5621  | 5890  | 5999  | 6326  | 6415  | 6    | 323   | 5.3 %  |
|                                    |       |       |       |       |       |       | 5780  | 5889  | 6221  | 6300  | 7    | 208   | 3.4 %  |
|                                    |       |       |       |       |       |       |       | 5810  | 6132  | 6210  | 8    | 118   | 1.9 %  |
|                                    |       |       |       |       |       |       |       |       | 6072  | 6142  | 9    | 50    | 0.8 %  |
|                                    |       |       |       |       |       |       |       |       |       | 6092  | 10   |       |        |

**Table S3.** Crude incidence and prevalence of HF in 2018, stratified by sex and age group

|                      | Prevalence |       |                     | Incidence |       |                     |
|----------------------|------------|-------|---------------------|-----------|-------|---------------------|
|                      | N          | n     | % (95% CI)          | PY        | n     | IR (95% CI)         |
| <b>Total</b>         | 4153010.5  | 90632 | 2.18 (2.17 -2.20)   | 4066606   | 14796 | 3.64 (3.58-3.70)    |
| <b>Sex</b>           |            |       |                     |           |       |                     |
| Women                | 2071252.5  | 37948 | 1.83 (1.81-1.85)    | 2034795   | 6814  | 3.35 (3.27-3.43)    |
| Men                  | 2081758    | 52684 | 2.53 (2.51-2.55)    | 2031811   | 7982  | 3.93 (3.84-4.01)    |
| <b>By age group,</b> |            |       |                     |           |       |                     |
| <b>Women</b>         |            |       |                     |           |       |                     |
| 18-24                | 230064     | 92    | 0.04 (0.03-0.05)    | 229975    | 20    | 0.09 (0.05-0.13)    |
| 25-29                | 183206     | 179   | 0.10 (0.08-0.11)    | 183021    | 27    | 0.15 (0.09-0.20)    |
| 30-34                | 175145.5   | 272   | 0.16 (0.14-0.17)    | 174909    | 39    | 0.22 (0.15-0.29)    |
| 35-39                | 169989     | 316   | 0.19 (0.17-0.21)    | 169721    | 53    | 0.31 (0.23-0.40)    |
| 40-44                | 172466     | 405   | 0.23 (0.21-0.26)    | 172072    | 58    | 0.34 (0.25-0.42)    |
| 45-49                | 185550     | 670   | 0.36 (0.33-0.39)    | 184896    | 95    | 0.51 (0.41-0.62)    |
| 50-54                | 174390.5   | 931   | 0.53 (0.50-0.57)    | 173546    | 142   | 0.82 (0.68-0.95)    |
| 55-59                | 157569     | 1219  | 0.77 (0.73-0.82)    | 156431    | 196   | 1.25 (1.08-1.43)    |
| 60-64                | 149228.5   | 1767  | 1.18 (1.13-1.24)    | 147572    | 285   | 1.93 (1.71-2.16)    |
| 65-69                | 135468.5   | 2669  | 1.97 (1.90-2.04)    | 132923    | 464   | 3.49 (3.17-2.81)    |
| 70-74                | 124944     | 4431  | 3.55 (3.44-3.65)    | 120812    | 782   | 6.47 (6.02-6.93)    |
| 75-79                | 82329      | 4855  | 5.90 (5.74-6.06)    | 77734     | 880   | 11.32 (10.58-12.06) |
| 80-84                | 59079.5    | 5762  | 9.75 (9.51-9.99)    | 53696     | 1076  | 20.04 (18.85-21.22) |
| 85-89                | 43142      | 6599  | 15.30 (14.96-15.64) | 36403     | 1251  | 34.37 (32.49-36.24) |
| ≥ 90                 | 28681      | 7781  | 27.13 (26.61-27.64) | 21086     | 1446  | 68.58 (65.17-71.99) |
| <b>By age group,</b> |            |       |                     |           |       |                     |
| <b>Men</b>           |            |       |                     |           |       |                     |
| 18-24                | 246372     | 151   | 0.06 (0.05-0.07)    | 246229    | 46    | 0.19 (0.13-0.24)    |
| 25-29                | 190617.5   | 246   | 0.13 (0.11-0.15)    | 190379    | 30    | 0.16 (0.10-0.21)    |
| 30-34                | 184118     | 351   | 0.19 (0.17-0.21)    | 183782    | 44    | 0.24 (0.17-0.31)    |
| 35-39                | 180407     | 513   | 0.28 (0.26-0.31)    | 179912    | 69    | 0.38 (0.29-0.47)    |
| 40-44                | 182129.5   | 735   | 0.40 (0.37-0.43)    | 181453    | 109   | 0.60 (0.49-0.71)    |
| 45-49                | 195061.5   | 1327  | 0.68 (0.64-0.72)    | 193774    | 227   | 1.17 (1.02-1.32)    |
| 50-54                | 183787.5   | 2338  | 1.27 (1.22-1.32)    | 181600    | 329   | 1.81 (1.62-2.01)    |
| 55-59                | 163937.5   | 3306  | 2.02 (1.95-2.08)    | 160717    | 446   | 2.78 (2.52-3.03)    |
| 60-64                | 149878.5   | 4857  | 3.24 (3.15-3.33)    | 145262    | 647   | 4.45 (4.11-4.80)    |
| 65-69                | 135216.5   | 6279  | 4.64 (4.53-4.76)    | 129193    | 831   | 6.43 (6.00-6.87)    |
| 70-74                | 119042.5   | 8594  | 7.22 (7.07-7.37)    | 110962    | 1129  | 10.17 (9.58-10.77)  |

|                      |          |       |                     |        |      |                      |
|----------------------|----------|-------|---------------------|--------|------|----------------------|
| 75-79                | 70758.5  | 7672  | 10.84 (10.61-11.07) | 63687  | 1145 | 17.98 (16.95-19.01)  |
| 80-84                | 43691    | 6759  | 15.47 (15.13-15.81) | 37408  | 1170 | 31.28 (29.51-33.04)  |
| 85-89                | 25375    | 5631  | 22.19 (21.68-22.70) | 19814  | 1015 | 51.23 (48.16-54.30)  |
| ≥ 90                 | 11365.5  | 3925  | 34.53 (33.66-35.41) | 7644   | 745  | 97.47 (90.82-104.12) |
| <b>By age group,</b> |          |       |                     |        |      |                      |
| <b>Total</b>         |          |       |                     |        |      |                      |
| 18-24                | 476436   | 243   | 0.05 (0.04-0.06)    | 476204 | 66   | 0.14 (0.11-0.17)     |
| 25-29                | 373823.5 | 425   | 0.11 (0.10-0.12)    | 373400 | 57   | 0.15 (0.11-0.19)     |
| 30-34                | 359263.5 | 623   | 0.17 (0.16-0.19)    | 358691 | 83   | 0.23 (0.18-0.28)     |
| 35-39                | 350396   | 829   | 0.24 (0.22-0.25)    | 349633 | 122  | 0.35 (0.29-0.41)     |
| 40-44                | 354595.5 | 1140  | 0.32 (0.30-0.34)    | 353525 | 167  | 0.47 (0.40-0.54)     |
| 45-49                | 380611.5 | 1997  | 0.52 (0.50-0.55)    | 378670 | 322  | 0.85 (0.76-0.94)     |
| 50-54                | 358178   | 3269  | 0.91 (0.88-0.94)    | 355145 | 471  | 1.33 (1.21-1.45)     |
| 55-59                | 321506.5 | 4525  | 1.41 (1.37-1.45)    | 317148 | 642  | 2.02 (1.87-2.18)     |
| 60-64                | 299107   | 6624  | 2.21 (2.16-2.27)    | 292833 | 932  | 3.18 (2.98-3.39)     |
| 65-69                | 270685   | 8948  | 3.31 (3.24-3.37)    | 262115 | 1295 | 4.49 (4.67-5.21)     |
| 70-74                | 243986.5 | 13025 | 5.34 (5.25-5.43)    | 231774 | 1911 | 8.25 (7.88-8.61)     |
| 75-79                | 153087.5 | 12527 | 8.18 (8.05-8.32)    | 141421 | 2025 | 14.32 (13.70-14.94)  |
| 80-84                | 102770.5 | 12521 | 12.18 (11.98-12.38) | 91104  | 2246 | 24.65 (23.65-25.66)  |
| 85-89                | 68517    | 12230 | 17.85 (17.56-18.14) | 56217  | 2266 | 40.31 (38.68-41.93)  |
| ≥ 90                 | 40046.5  | 11706 | 29.23 (28.79-29.68) | 28730  | 2191 | 76.26 (73.19-79.33)  |

Unadjusted prevalence and incidence in 2018 utilizing all available data. CI; Confidence intervals. PY; person years. IR; Incidence rate per 1000 person years.

**Figure S2.** Yearly prevalence from 2014-2018 by 5-year age groups

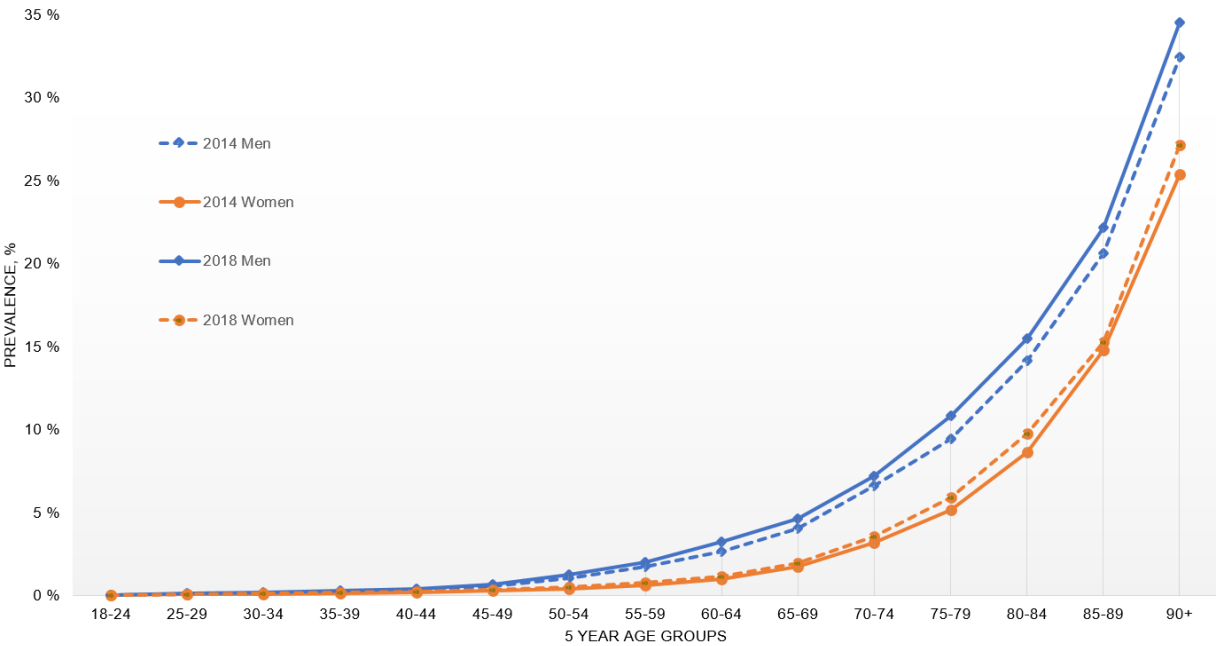

Supplement: 12872_2022_2522_MOESM1_ESM.pdf [file 12872_2022_2522_MOESM1_ESM.pdf]
